# Supplementary material for: Image Analysis for Spectroscopic Elemental Dot Maps: P, Al, and Ca Associations in Water Treatment Residuals as a Case Study
Source: Frontiers journal article supplement (doi:10.3389/fenvc.2021.719300), 2021-07-19
Supplement: Data_Sheet_1.docx [file Data_Sheet_1.docx]

Supplementary Material


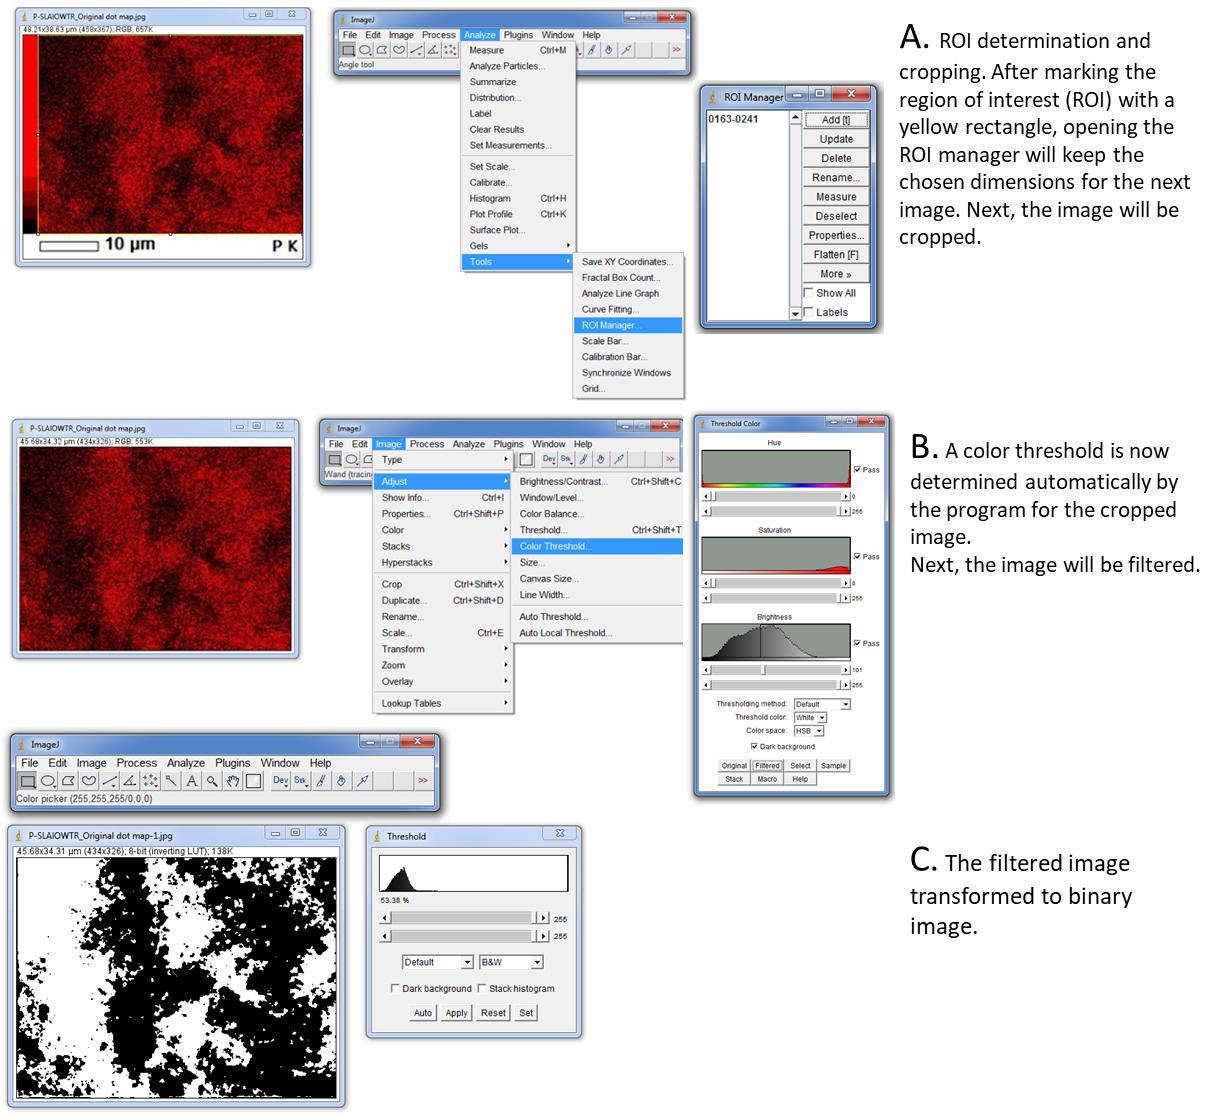


**Supplementary Figure 1.** Image processing and menus in use for **(A)** ROI (region of interest) determination, **(B)** Filtration and **(C)** Binary transformation.
